# Supplementary material for: Evaluation of Precision Ingredient Inclusion on Production Efficiency Responses in Finishing Beef Cattle
Source: MDPI journal article supplement (doi:10.3390/ruminants4010007), 2024-02-22
Supplement: s1 [file s1]

| Table S1. Random integer assignment for adjusting inclusion tolerances |       |       |      |   |      |       |       |       |
|------------------------------------------------------------------------|-------|-------|------|---|------|-------|-------|-------|
| 1                                                                      | 2     | 3     | 4    | 5 | 6    | 7     | 8     | 9     |
| -20.0                                                                  | -15.0 | -10.0 | -5.0 | - | +5.0 | +10.0 | _15.0 | +20.0 |

| Table S2. Adjusted inclusion tolerances for dietary ingredients for day and week of study for Experiment 1 <sup>a, b</sup> |                |   |   |   |   |   |   |   |    |    |    |    |    |    |    |
|----------------------------------------------------------------------------------------------------------------------------|----------------|---|---|---|---|---|---|---|----|----|----|----|----|----|----|
| Day of Week                                                                                                                | Week of Study  |   |   |   |   |   |   |   |    |    |    |    |    |    |    |
|                                                                                                                            | 1              | 2 | 3 | 4 | 5 | 6 | 7 | 9 | 10 | 11 | 12 | 13 | 14 | 15 | 16 |
| 1                                                                                                                          | 2 <sup>c</sup> | 2 | 3 | 3 | 4 | 2 | 7 | 6 | 2  | 3  | 3  | 4  | 2  | 7  | 6  |
|                                                                                                                            | 9 <sup>d</sup> | 5 | 5 | 8 | 6 | 9 | 1 | 3 | 5  | 5  | 8  | 6  | 9  | 1  | 3  |
| 2                                                                                                                          | 1              | 7 | 2 | 9 | 1 | 8 | 8 | 9 | 7  | 2  | 9  | 1  | 8  | 8  | 9  |
|                                                                                                                            | 4              | 6 | 8 | 6 | 3 | 9 | 3 | 1 | 6  | 8  | 6  | 3  | 9  | 3  | 1  |
| 3                                                                                                                          | 3              | 2 | 1 | 3 | 8 | 4 | 5 | 4 | 2  | 1  | 3  | 8  | 4  | 5  | 4  |
|                                                                                                                            | 5              | 7 | 6 | 8 | 7 | 3 | 4 | 8 | 7  | 6  | 8  | 7  | 3  | 4  | 8  |
| 4                                                                                                                          | 7              | 8 | 7 | 5 | 2 | 6 | 2 | 2 | 8  | 7  | 5  | 2  | 6  | 2  | 2  |
|                                                                                                                            | 8              | 5 | 9 | 9 | 8 | 5 | 9 | 5 | 5  | 9  | 9  | 8  | 5  | 9  | 5  |
| 5                                                                                                                          | 6              | 1 | 2 | 4 | 4 | 7 | 1 | 7 | 1  | 2  | 4  | 4  | 7  | 1  | 7  |
|                                                                                                                            | 3              | 3 | 7 | 1 | 1 | 2 | 4 | 6 | 3  | 7  | 1  | 1  | 2  | 4  | 6  |
| 6                                                                                                                          | 9              | 9 | 5 | 7 | 6 | 1 | 3 | 2 | 9  | 5  | 7  | 6  | 1  | 3  | 2  |
|                                                                                                                            | 1              | 4 | 6 | 2 | 7 | 6 | 5 | 7 | 4  | 6  | 2  | 7  | 6  | 5  | 7  |
| 7                                                                                                                          | 4              | 6 | 1 | 5 | 5 | 9 | 7 | 8 | 6  | 1  | 5  | 5  | 9  | 7  | 8  |
|                                                                                                                            | 8              | 4 | 4 | 9 | 3 | 2 | 8 | 5 | 4  | 4  | 9  | 3  | 2  | 8  | 5  |

<sup>a</sup> random weekly integer assignment for adjusted inclusion tolerances.

<sup>b</sup> High-moisture ear corn inclusion was adjusted so that the targeted as-fed amount of the diet was delivered daily.

<sup>c</sup> first integer corresponding to liquid supplement added.

<sup>d</sup> second integer corresponding to dried distillers grains plus solubles added.

| Table S3. Adjusted inclusion tolerances for dietary ingredients for day and week of study for Experiment 2 <sup>a, b</sup> |                |   |   |   |   |   |   |   |    |    |    |    |
|----------------------------------------------------------------------------------------------------------------------------|----------------|---|---|---|---|---|---|---|----|----|----|----|
| Day of Week                                                                                                                | Week of Study  |   |   |   |   |   |   |   |    |    |    |    |
|                                                                                                                            | 1              | 2 | 3 | 4 | 5 | 6 | 7 | 9 | 10 | 11 | 12 | 13 |
| 1                                                                                                                          | 2 <sup>c</sup> | 5 | 3 | 8 | 7 | 5 | 2 | 6 | 7  | 3  | 2  | 1  |
|                                                                                                                            | 9 <sup>d</sup> | 1 | 8 | 4 | 1 | 7 | 7 | 1 | 2  | 9  | 8  | 7  |
|                                                                                                                            | 1 <sup>e</sup> | 3 | 9 | 1 | 8 | 6 | 5 | 3 | 1  | 1  | 1  | 2  |
| 2                                                                                                                          | 4              | 9 | 6 | 6 | 3 | 2 | 6 | 8 | 6  | 4  | 6  | 5  |
|                                                                                                                            | 3              | 4 | 3 | 7 | 5 | 7 | 1 | 7 | 9  | 8  | 7  | 9  |
|                                                                                                                            | 5              | 6 | 8 | 5 | 4 | 8 | 4 | 2 | 2  | 2  | 9  | 4  |
| 3                                                                                                                          | 7              | 4 | 5 | 3 | 2 | 5 | 3 | 8 | 7  | 5  | 2  | 6  |
|                                                                                                                            | 8              | 3 | 9 | 2 | 9 | 1 | 8 | 4 | 1  | 7  | 7  | 1  |
|                                                                                                                            | 6              | 5 | 4 | 9 | 1 | 3 | 9 | 1 | 8  | 6  | 5  | 3  |
| 4                                                                                                                          | 3              | 2 | 1 | 8 | 4 | 9 | 6 | 6 | 3  | 2  | 6  | 8  |
|                                                                                                                            | 9              | 8 | 7 | 9 | 3 | 4 | 3 | 7 | 5  | 7  | 1  | 7  |
|                                                                                                                            | 1              | 1 | 2 | 4 | 5 | 6 | 8 | 5 | 4  | 8  | 4  | 2  |
| 5                                                                                                                          | 4              | 6 | 5 | 3 | 7 | 4 | 5 | 3 | 2  | 5  | 3  | 8  |
|                                                                                                                            | 8              | 7 | 9 | 6 | 8 | 3 | 9 | 2 | 9  | 1  | 8  | 4  |
|                                                                                                                            | 2              | 9 | 4 | 5 | 6 | 5 | 4 | 9 | 1  | 3  | 9  | 1  |
| 6                                                                                                                          | 5              | 2 | 6 | 7 | 3 | 2 | 1 | 8 | 4  | 9  | 6  | 6  |
|                                                                                                                            | 7              | 7 | 1 | 2 | 9 | 8 | 7 | 9 | 3  | 4  | 3  | 7  |
|                                                                                                                            | 6              | 5 | 3 | 1 | 1 | 1 | 2 | 4 | 5  | 6  | 8  | 5  |
| 7                                                                                                                          | 2              | 6 | 8 | 6 | 4 | 6 | 5 | 3 | 7  | 4  | 5  | 3  |
|                                                                                                                            | 7              | 1 | 7 | 9 | 8 | 7 | 9 | 6 | 8  | 3  | 9  | 2  |
|                                                                                                                            | 8              | 4 | 2 | 2 | 2 | 9 | 4 | 5 | 6  | 5  | 4  | 9  |

<sup>a</sup> random weekly integer assignment for adjusted inclusion tolerances.

<sup>b</sup> Dry-rolled corn was used to adjust the delivered feed quantity to meet the targeted as-fed amount or to scale the total feed delivery accordingly from d 1 to 42 and from d 42 till harvest, corn silage was used to adjust the delivered feed quantity to match the targeted as-fed amount or to scale the total feed delivery accordingly.

<sup>c</sup> first integer corresponding to high-moisture corn from d 1 to 42 and dry-rolled corn from d 42 to harvest.

<sup>d</sup> second integer corresponding to dried distillers grains plus solubles added from d 1 to harvest.

<sup>e</sup> third integer corresponding to corresponding to oat hay added from d 1 to harvest.
